# Supplementary material
Source: Springer Nature journal article supplement (https://www.springermedizin.de/resource/supplementary/13256_2010_1536_MOESM1_ESM.pdf/9647876)

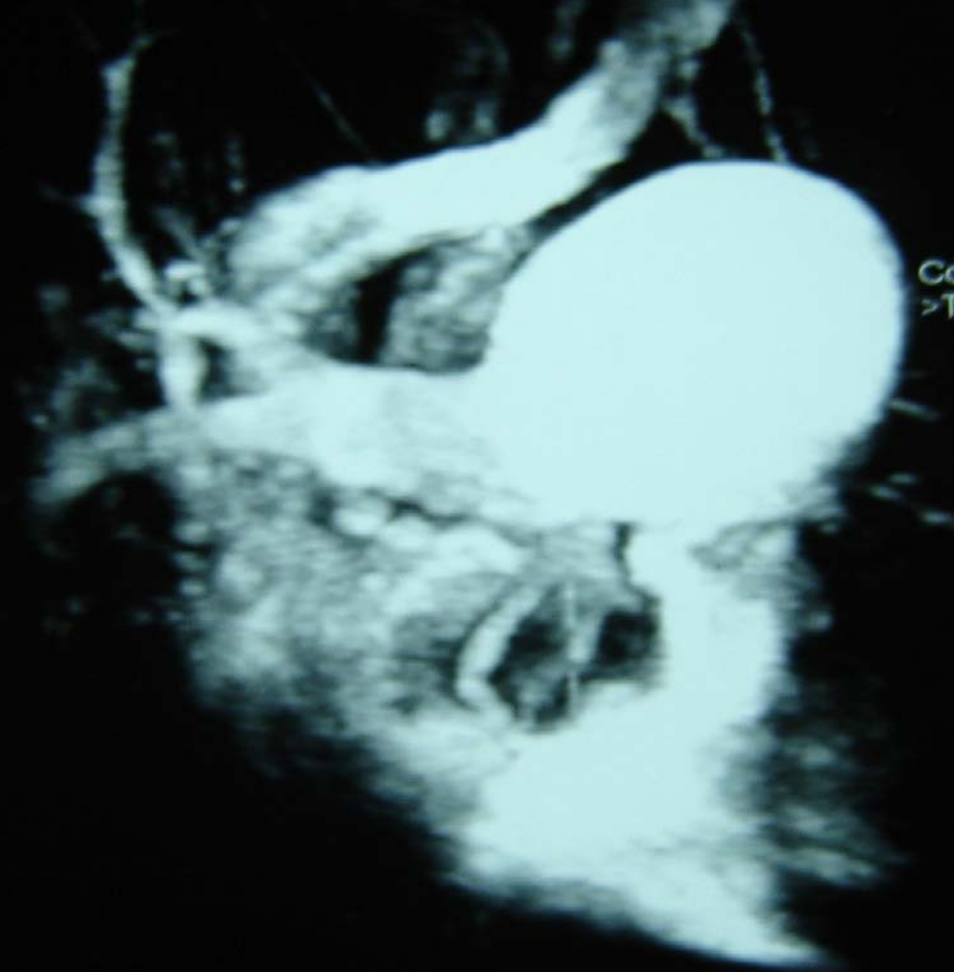

CO  
>T

Supplement: MOESM1 [file 9647876]
